# Supplementary material for: Phylogenetic Analysis Based on DNA Barcoding and Genetic Diversity Assessment of Morinda officinalis How in Vietnam Inferred by Microsatellites
Source: MDPI journal article supplement (doi:10.3390/genes13111938), 2022-10-25
Supplement: s1 [file s1]

## Supporting information

**Table S1.** Geographical characteristics of the 37 samples of *M. officinalis* used in this study

| Samples | Pop. | Locations                                                     | Latitude (N) | Longitude (E) |
|---------|------|---------------------------------------------------------------|--------------|---------------|
| H1      | Hue  | Phong Xuan commune, Phong Dien district Hue province, Vietnam | 75°05'38"    | 182°38'90"    |
| H2      |      | Phong Xuan commune, Phong Dien district Hue province, Vietnam | 75°05'37"    | 182°38'90"    |
| H3      |      | Phong Xuan commune, Phong Dien district Hue province, Vietnam | 75°05'33"    | 182°38'89"    |
| H4      |      | Phong Xuan commune, Phong Dien district Hue province, Vietnam | 75°05'38"    | 182°38'81"    |
| H5      |      | Phong Xuan commune, Phong Dien district Hue province, Vietnam | 75°05'38"    | 182°38'45"    |
| H6      |      | Phong Xuan commune, Phong Dien district Hue province, Vietnam | 75°05'36"    | 182°38'47"    |
| H7      |      | Phong Xuan commune, Phong Dien district Hue province, Vietnam | 75°05'64"    | 182°39'14"    |

---

|     |                                                               |           |            |
|-----|---------------------------------------------------------------|-----------|------------|
| H8  | Phong Xuan commune, Phong Dien district Hue province, Vietnam | 75°05'63" | 182°39'22" |
| H9  | Phong Xuan commune, Phong Dien district Hue province, Vietnam | 75°05'66" | 182°39'26" |
| H10 | Phong Xuan commune, Phong Dien district Hue province, Vietnam | 75°05'16" | 182°38'05" |
| H11 | Phong Xuan commune, Phong Dien district Hue province, Vietnam | 75°05'11" | 182°37'85" |
| H12 | Phong Xuan commune, Phong Dien district Hue province, Vietnam | 75°05'03" | 182°37'87" |
| H13 | Phong Xuan commune, Phong Dien district Hue province, Vietnam | 75°04'88" | 182°37'86" |
| H14 | Phong Xuan commune, Phong Dien district Hue province, Vietnam | 73°99'80" | 181°60'86" |
| H15 | Phong Xuan commune, Phong Dien district Hue province, Vietnam | 74°00'58" | 181°61'37" |
| H16 | Phong Xuan commune, Phong Dien district Hue province, Vietnam | 74°00'55" | 181°61'36" |

---

---

|     |           |                                                               |           |            |
|-----|-----------|---------------------------------------------------------------|-----------|------------|
| H17 |           | Phong Xuan commune, Phong Dien district Hue province, Vietnam | 74°00'86" | 181°61'57" |
| H18 |           | Phong Xuan commune, Phong Dien district Hue province, Vietnam | 74°01'11" | 181°62'06" |
| QN1 | Quang Nam | Phuoc Son district, Quang Nam province, Vietnam               | 50°97'65" | 170°16'74" |
| QN2 |           | Phuoc Son district, Quang Nam province, Vietnam               | 50°97'64" | 170°16'79" |
| QN3 |           | Phuoc Son district, Quang Nam province, Vietnam               | 50°97'82" | 170°16'92" |
| QN4 |           | Phuoc Son district, Quang Nam province, Vietnam               | 50°99'56" | 170°15'06" |
| QN5 |           | Phuoc Son district, Quang Nam province, Vietnam               | 50°97'82" | 170°16'92" |
| QN6 |           | Phuoc Son district, Quang Nam province, Vietnam               | 50°97'95" | 170°16'72" |
| QN7 |           | Phuoc Son district, Quang Nam province, Vietnam               | 50°97'95" | 170°16'72" |
| QN8 |           | Phuoc Son district, Quang Nam province, Vietnam               | 50°99'55" | 170°15'00" |
| QN9 |           | Phuoc Son district, Quang Nam province, Vietnam               | 50°99'56" | 170°14'95" |

---

|      |            |                                                 |             |              |
|------|------------|-------------------------------------------------|-------------|--------------|
| QN10 |            | Phuoc Son district, Quang Nam province, Vietnam | 50°99'55"   | 170°15'00"   |
| QB1  | Quang Binh | Minh Hoa district, Quang Binh Province, Vietnam | 17°45'14.94 | 106° 4'6.04  |
| QB2  |            | Minh Hoa district, Quang Binh Province, Vietnam | 17°45'9.23  | 106° 4'7.34  |
| QB3  |            | Minh Hoa district, Quang Binh Province, Vietnam | 17°45'7.63  | 106°4'12.89  |
| QB4  |            | Minh Hoa district, Quang Binh Province, Vietnam | 17°45'8.88  | 106° 4'16.14 |
| QB5  |            | Minh Hoa district, Quang Binh Province, Vietnam | 17°45'5.60  | 106° 4'17.81 |
| QB6  |            | Minh Hoa district, Quang Binh Province, Vietnam | 17°45'4.06  | 106° 4'20.23 |
| QB7  |            | Minh Hoa district, Quang Binh Province, Vietnam | 17°45'4.49  | 106° 4'21.94 |
| QB8  |            | Minh Hoa district, Quang Binh Province, Vietnam | 17°44'59.83 | 106° 4'30.69 |
| QB9  |            | Minh Hoa district, Quang Binh Province, Vietnam | 17°44'57.64 | 106° 4'30.42 |

**Table S2.** The primers used for PCR and sequencing in this study

| SSR loci | Forward sequences | Reverse sequences | Repeat motif | Expected allele size (bp) | Annealing temperature (°C) | Genbank accession no. | Ref. |
|----------|-------------------|-------------------|--------------|---------------------------|----------------------------|-----------------------|------|
|----------|-------------------|-------------------|--------------|---------------------------|----------------------------|-----------------------|------|

|      |                               |                               |                         |     |    |               |
|------|-------------------------------|-------------------------------|-------------------------|-----|----|---------------|
|      | GATTAACGCCACCGGATACG          | (CCG)                         |                         |     |    |               |
| MO02 | TGTTG                         | GAGGAGGT<br>TA                | 5...(CC<br>G)6          | 204 | 50 | MF496207      |
| MO04 | TCTCTTGCCTC<br>TGGTAGTT       | ACCCTCAAT<br>GGAGAACA<br>AC   | (GCC)<br>6...(T<br>GC)5 | 164 | 51 | MF496208      |
| MO05 | TAACTAATGG<br>CGTACTTGG       | GCTCATCTA<br>CCACTACTG<br>AA  | (GAA)<br>7(AGA<br>)5    | 214 | 50 | MF496209      |
| MO12 | TTGGCTGTGT<br>GCTTCTTT        | ATTCCTTCC<br>TTCCTCCTA<br>ATC | GT)9                    | 135 | 50 | MF496210      |
| MO19 | TCTCGCATTC<br>AGGCAAAG        | TCTCGCATTA<br>GGCAAAG         | (GA)8                   | 111 | 51 | MF496211      |
| MO26 | TAGTTGAGCC<br>GCTTGAGT        | GGTTCCATT<br>CCATTCAGA<br>GG  | (CT)7                   | 193 | 51 | MF496212      |
| MO30 | CATGAGTTGC<br>AGATGGAAT       | AGAGACAGA<br>GATTAGACG<br>AA  | (AT)7                   | 158 | 51 | MF496213 [16] |
| MO38 | AAAGTGGGTG<br>AGGGTTAGA       | CAGAGTGGT<br>GGACGAATA<br>G   | (AG)6                   | 206 | 52 | MF496216      |
| MO39 | TAGACCATAG<br>GCTGGAGTT       | TTGCTAAGG<br>AATCAGGAG<br>TT  | (TG)6                   | 182 | 51 | MF496217      |
| MO41 | CACACTATAC<br>TCAAGCACAT<br>C | GTTGGGCTG<br>ACCTTTCCT<br>T   | (TA)6                   | 141 | 50 | MF496218      |
| MO43 | CTCTCCTTCTC<br>CTTATCTCTG     | GGAAGTGGC<br>AATGGACTT        | (CT)6                   | 261 | 50 | MF496219      |
| MO47 | CTGCGGAGTG<br>CATAAGAA        | TAGCCAATCGT<br>AGAGAATAG      | (GA)6                   | 173 | 50 | MF496220      |
| MO53 | TCCACAGGCT<br>AAGATTACAC      | CCAGCATAG<br>TCTTCCTCTA       | (CT)6                   | 116 | 50 | MF496221      |

| G    |                               |                                       |     |    |          |  |
|------|-------------------------------|---------------------------------------|-----|----|----------|--|
| MO57 | GCATCATTAG<br>AGCTACTAGA<br>C | TGTTGTCACT (CAG)<br>GTACTTCATC 8      | 172 | 50 | MF496222 |  |
| MO60 | TGAATTGGGT<br>GAAGAACCA       | CTTAAGTCA (CAA)<br>CTGATCTGT 8<br>CTG | 154 | 50 | MF496223 |  |
| MO61 | TCAAGGACAG<br>TATTGTGGAA      | CATCATCAT (TAA)<br>TGCTGCTCT 8<br>TA  | 189 | 50 | MF496224 |  |
| MO63 | ACATTGCCGA<br>ATACCATCT       | CCAGAGTTG (GTG)<br>TTGTCAAGT 7<br>T   | 134 | 50 | MF496225 |  |
| MO88 | TCCGACTTGC<br>TTCATTGG        | TTGGGCTCA (TTG)<br>ACCTTCTCA 6        | 197 | 51 | MF496226 |  |
| MO89 | AGCCGATACT<br>AAACTGTCAA      | AACCATCAC (ATC)<br>TCAATGTTCC 6<br>A  | 240 | 51 | MF496227 |  |
| MO90 | TTACAACTGT<br>GGCAGAACT       | ATCCAGCAC (GTG)<br>TACCAATCC 6        | 170 | 50 | MF496228 |  |
| MO94 | ACTAAGCCGA<br>GTGAATTACA      | TTCCAACCT (TGC)<br>GCCTATCCA 6        | 201 | 50 | MF496229 |  |
| MO96 | AGGTAACTTCA<br>GTCAACAC       | TGGGAATGT (CAA)<br>CAACAGAAA 6<br>TC  | 122 | 50 | MF496230 |  |

**Table S3.** The samples were deposited in the GenBank and their accession numbers

| No. | Samples | Primer | Population | Accession                  |
|-----|---------|--------|------------|----------------------------|
| 1   | H01     | ITS1   | TTH        | <a href="#">ON819584.1</a> |
| 2   | H02     | ITS1   | TTH        | <a href="#">ON819586.1</a> |
| 3   | H03     | ITS1   | TTH        | <a href="#">ON819588.1</a> |
| 4   | QN01    | ITS1   | QN         | <a href="#">ON819590.1</a> |
| 5   | QN02    | ITS1   | QN         | <a href="#">ON819591.1</a> |
| 6   | QN03    | ITS1   | QN         | <a href="#">ON819592.1</a> |
| 7   | QB01    | ITS1   | QB         | <a href="#">ON819596.1</a> |

---

|    |      |      |     |            |
|----|------|------|-----|------------|
| 8  | QB02 | ITS1 | QB  | ON819597.1 |
| 9  | QB03 | ITS1 | QB  | ON819598.1 |
| 10 | H01  | ITS2 | TTH | ON819585.1 |
| 11 | H02  | ITS2 | TTH | ON819587.1 |
| 12 | H03  | ITS2 | TTH | ON819589.1 |
| 13 | QN01 | ITS2 | QN  | ON819593.1 |
| 14 | QN02 | ITS2 | QN  | ON819594.1 |
| 15 | QN03 | ITS2 | QN  | ON819595.1 |
| 16 | QB01 | ITS2 | QB  | ON819599.1 |
| 17 | QB02 | ITS2 | QB  | ON819600.1 |
| 18 | QB03 | ITS2 | QB  | ON819601.1 |
| 19 | H01  | MatK | TTH | ON926564.1 |
| 20 | QN01 | MatK | QN  | ON926565.1 |
| 21 | QN02 | MatK | QN  | ON926566.1 |
| 22 | QN03 | MatK | QN  | ON926567.1 |
| 23 | H01  | rbcL | TTH | ON926568.1 |
| 24 | H02  | rbcL | TTH | ON926569.1 |
| 25 | QN01 | rbcL | QN  | ON926570.1 |
| 26 | QN03 | rbcL | QN  | ON926571.1 |
| 27 | QB02 | rbcL | QB  | ON926572.1 |

---
